# Supplementary material
Source: PubMed Central journal article supplement (PMC1847667)

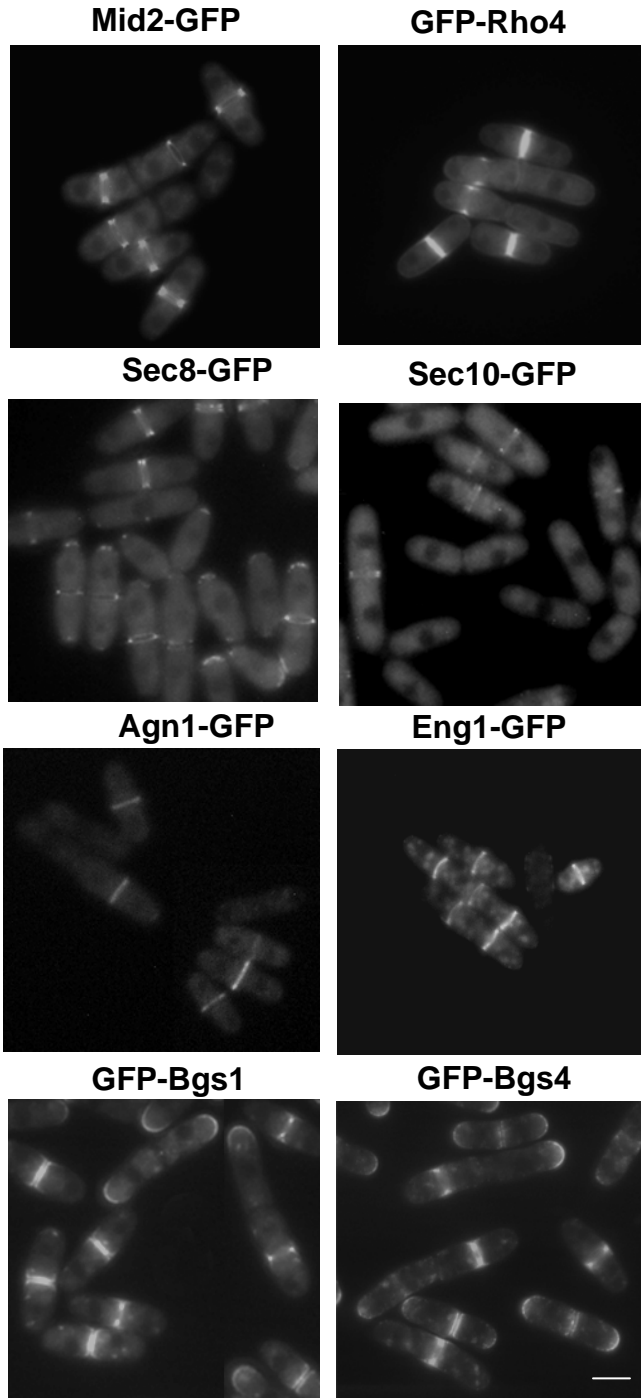

Coll et al., Figure S1

Supplement: 7601641s4.pdf [file 7601641s4.pdf]

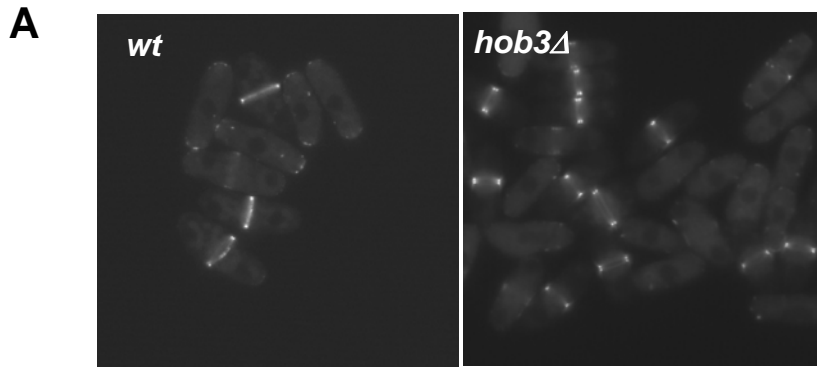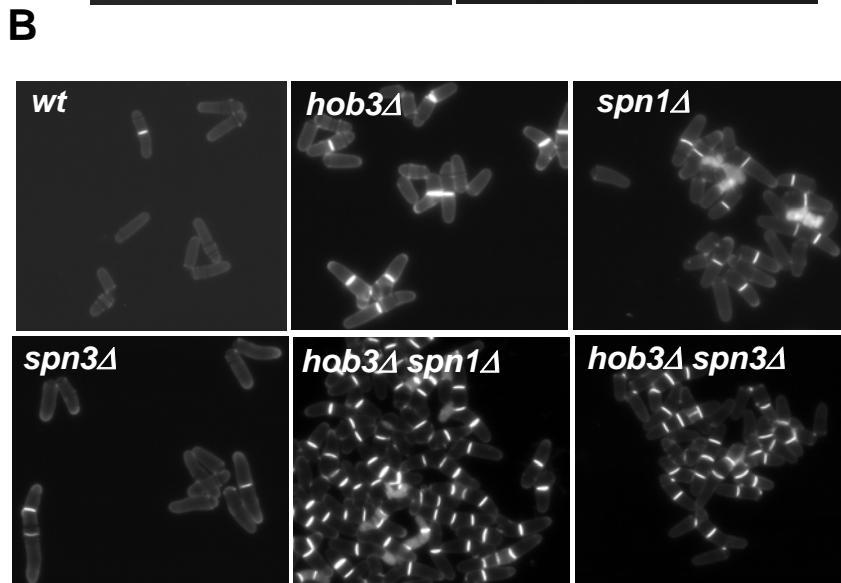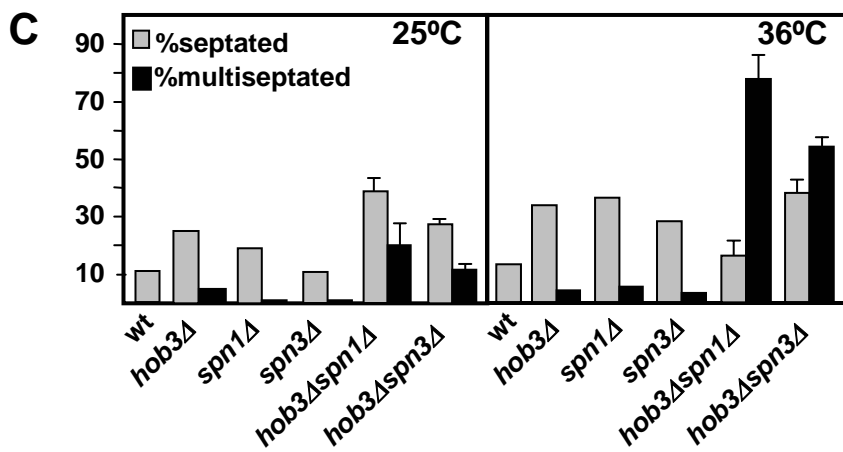

Supplement: 7601641s5.pdf [file 7601641s5.pdf]
